# Supplementary material for: Cerium oxide modified iridium nanorods for highly efficient electrochemical water splitting
Source: Royal Society of Chemistry journal article supplement (doi:10.1039/d1cc02580e), 2021-01-01
Supplement: d1cc02580e1.pdf [file d1cc02580e1.pdf]

## Supporting Information

### **Cerium Oxide Modified Iridium Nanorods for Highly Efficient Electrochemical Water Splitting**

Kai Xu,<sup>a</sup> Zizeng Zhu,<sup>a</sup> Wen Guo,<sup>a</sup> Hongyan Zhang,<sup>a</sup> Tingting Yu,<sup>a</sup> Wenxian Wei,<sup>c</sup> Wenjie

Liang,<sup>a</sup> Dongen Zhang,<sup>a</sup> Maoshuai He,<sup>\*b</sup> and Tao Yang<sup>\*a</sup>

<sup>a</sup> School of Environmental and Chemical Engineering, Jiangsu Ocean University,  
Lianyungang 222005, Jiangsu, China

<sup>b</sup> State Key Laboratory of Eco-Chemical Engineering, Ministry of Education,  
College of Chemistry and Molecular Engineering, Qingdao University of Science and  
Technology, Qingdao 266042, Shandong, China

<sup>c</sup> Testing Center, Yangzhou University, Yangzhou 225009, Jiangsu, China

Correspondence and requests for materials should be addressed to Tao Yang

([yangtao\\_hit@163.com](mailto:yangtao_hit@163.com))

## **Experimental section**

### **Materials**

Iridium chloride hydrate ( $\text{IrCl}_3 \cdot x\text{H}_2\text{O}$ , 99.8%), potassium iodide (KI,  $\geq 99.99\%$ ), sodium dodecyl sulfate (SDS, 99.0%), polyvinylpyrrolidone (PVP, K30), cerium (III) chloride heptahydrate ( $\text{CeCl}_3 \cdot 7\text{H}_2\text{O}$ , 99.8%) were all purchased from Aladdin. All the chemicals in the experiments were used as purchased without further purification.

### **Preparation of Ir/CeO<sub>2</sub> NRs**

The Ir/CeO<sub>2</sub> NRs were prepared with a hydrothermal method. Typically, 20 mg of  $\text{IrCl}_3 \cdot x\text{H}_2\text{O}$ , 170 mg of KI, 150 mg of PVP, 180 mg of SDS and 30 mg of  $\text{CeCl}_3 \cdot 7\text{H}_2\text{O}$  were dissolved in 12 mL of deionized water. The resultant homogeneous mixture was stirred in ambient atmosphere at 800 rpm for 10 min. Then the well-dispersed solution was transferred to a 20 mL Teflon-lined stainless autoclave and heated at 180 °C for 24 h in a hot air oven. After cooling to room temperature, the obtained product was collected via centrifugation and rinsed with deionized water at least 3 times, then final product was dried at 80 °C overnight. As contrasts, pure Ir nanorods and CeO<sub>2</sub> nanorods were synthesized by applying a similar synthesis strategy.

### **Structural characterization**

The crystal structures of the as-prepared Ir/CeO<sub>2</sub> NRs electrocatalyst was characterized by powder X-ray diffraction (XRD) conducted on a Bruker D8 Advance X-ray diffractometer (Cu K $\alpha$  radiation, 40 kV, 40 mA). X-ray photoelectron spectroscopy (XPS) was recorded on a Thermo Scientific K-Alpha XPS instrument. Transmission electron microscopy (TEM), high-resolution transmission electron

microscopy (HRTEM), energy dispersive X-ray spectroscopy (EDS) and corresponding elemental mapping were achieved by a FEI Tecnai G2 F30.

### **Electrochemical measurements**

Prior to the measurements, the as-synthesized Ir/CeO<sub>2</sub> NRs (10 mg) were mixed with Vulcan XC-72 carbon (10 mg) in ethanol (10 mL) through ultra-sonication (60 min) and then collected via centrifuge.

The catalyst ink was acquired by adding 5 mg of carbon-supported Ir/CeO<sub>2</sub> NRs into a mixture solution containing 2 mL of water, 1 mL of isopropanol and 25  $\mu$ L of 5 wt.% Nafion under sonication. Eventually, 15  $\mu$ L of catalyst ink was transferred onto a pre-cleaned rotating disk electrode (RDE) (diameter: 5 mm). After natural drying under air atmosphere, these as-prepared electrodes were used to test the electrocatalyst performance. For comparison, Ir nanorods were also loaded on carbon support and tested through the same process.

All electrochemical experiments were measured in 1.0 M KOH on an Autolab potentiostat/galvanostat (PGSTAT-302N) workstation with a typical three-electrode cell system at room temperature. RDE, graphite rod and Hg/HgO electrode were used as working electrode, counter electrode, and reference electrode, respectively. The linear sweep voltammetry (LSV) curves were performed at a scan rate of 5 mV s<sup>-1</sup> and a rotation speed of 1600 rpm in 1.0 M KOH, and 20 cycles of cyclic voltammetry (CV) tests are operated before the measurements for activation. All applied potentials were switched with respect to the reversible hydrogen electrode (RHE) based on the following equation:  $E \text{ (V vs. RHE)} = E \text{ (V vs. Hg/HgO)} + 0.0591 \text{ pH} + 0.098$ , and the

overpotential ( $\eta$ ) for OER was calculated using the following equation:  $\eta = E \text{ (V vs. RHE)} - 1.23 \text{ V}$ .<sup>1</sup>

For HER measures, the LSVs were subsequently performed at a scan rate of  $5 \text{ mV s}^{-1}$  with iR compensation. As for the OER tests, the LSVs were subsequently carried out at a scan rate of  $10 \text{ mV s}^{-1}$  with iR compensation. Chronoamperometry was used to evaluate the durability at the overpotential to achieve the constant current density of  $10 \text{ mA cm}^{-2}$ . To investigate the electrochemical active surface areas (EASAs), CVs were conducted at various scanning rates ( $20, 40, 60, 80, 100 \text{ mV s}^{-1}$ ) to acquire electrochemical double-layer capacitance ( $C_{dl}$ ) values.<sup>2</sup> Electrochemical impedance spectroscopy (EIS) measurements were conducted in the frequency range of  $0.01$  to  $10^5$  Hz with an AC amplitude of  $5 \text{ mV}$ . The electrolyte was bubbled for  $30 \text{ min}$  with high-purity Ar before each measurement.

## Figures

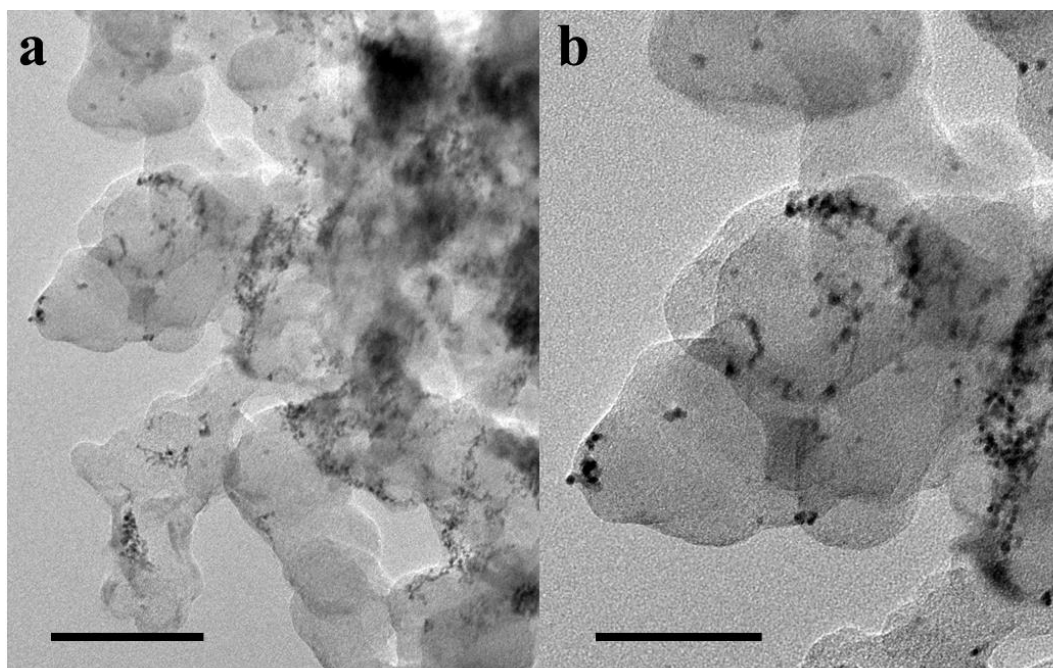

Figure S1 TEM images of the products at (a) low and (b) high magnifications. The scale bars in (a) and (b) are 100 nm and 50 nm, respectively. The Ir nanorods are highly dispersed on the CeO<sub>2</sub> support.

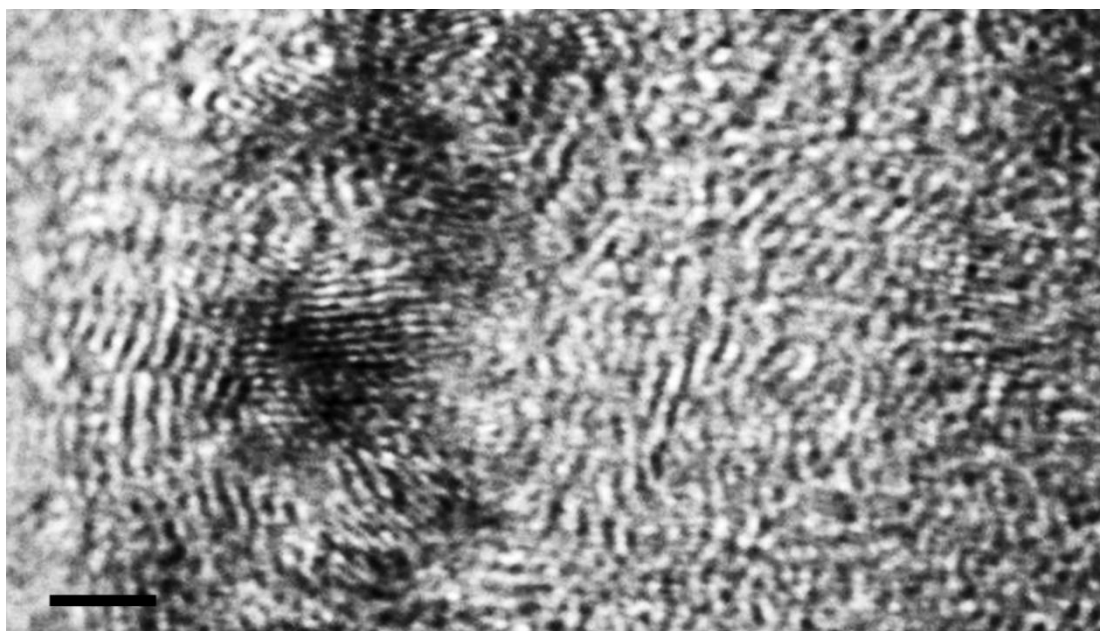

Figure S2 HRTEM of the product. The scale bar is 2 nm. Ir nanoparticles tightly grew on the  $\text{CeO}_2$  surface with various orientations.

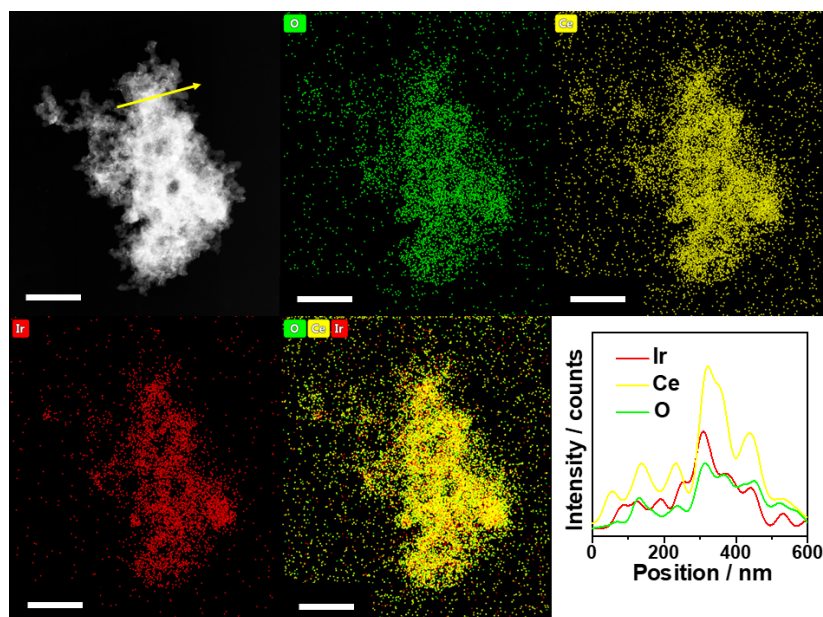

Figure S3 HAADF-STEM image, elemental mapping and EDX cross-sectional compositional line scanning of the product. The scale bar is 500 nm.

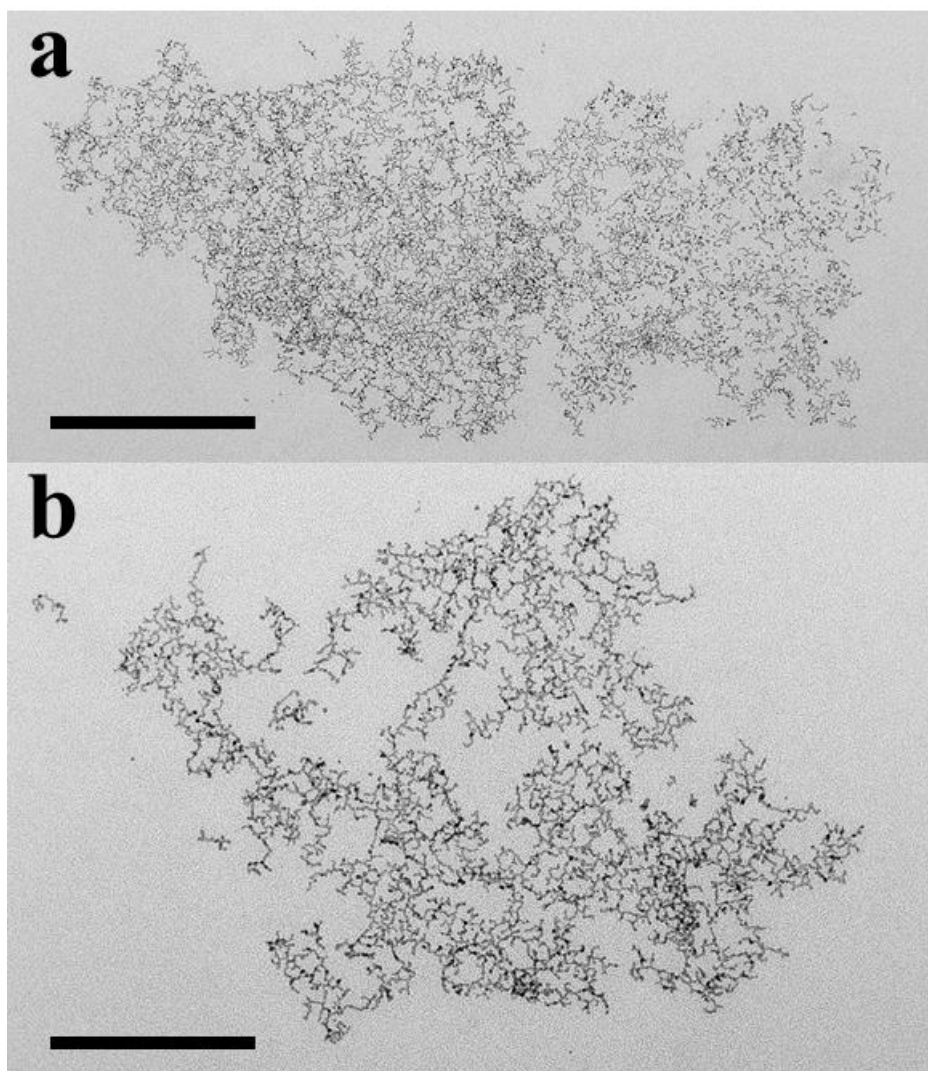

Figure S4 TEM images of Ir nanorods at (a) low and (b) high magnifications. The scale bars in (a) and (b) are 200 nm and 100 nm, respectively.

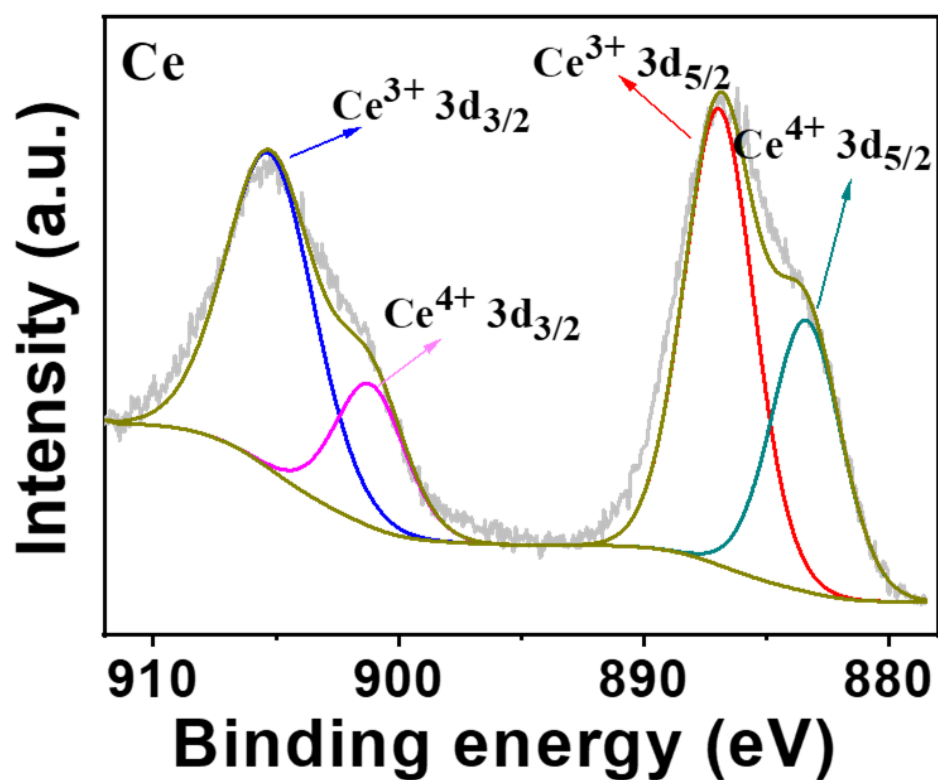

Figure S5 XPS spectra of Ce in Ir/CeO<sub>2</sub>

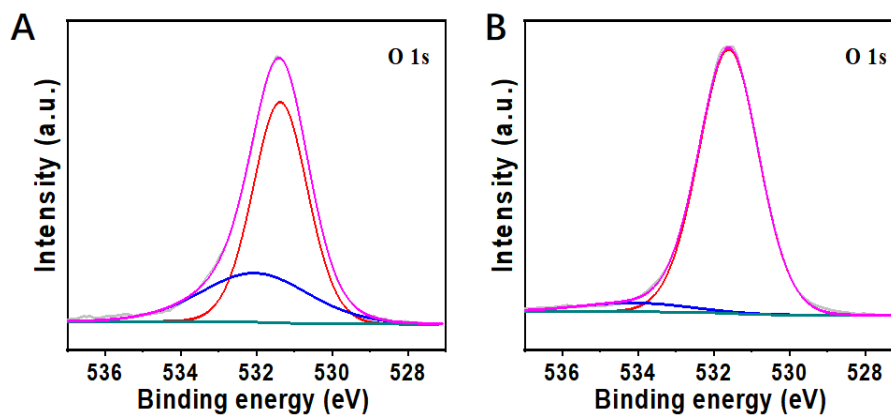

Figure S6 The High-resolution O 1s XPS spectra of (A) Ir/CeO<sub>2</sub> and (B) Ir.

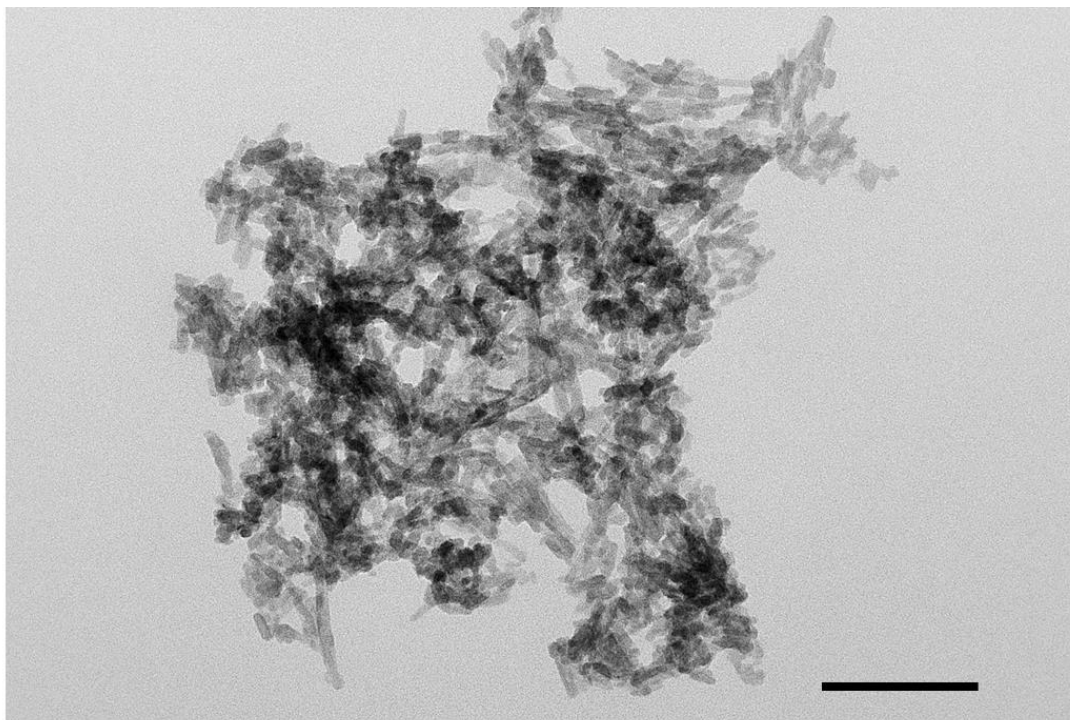

Figure S7 TEM image of CeO<sub>2</sub> prepared in the same process. The scale bar is 100 nm.

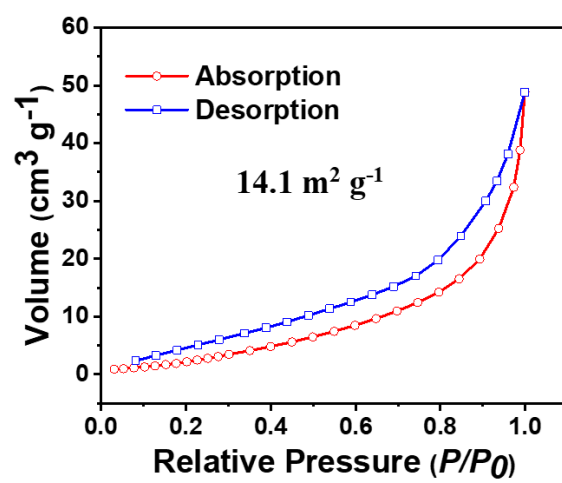

Figure S8 Nitrogen adsorption-desorption isotherms of Ir/CeO<sub>2</sub>. The BET area is 14.1  $\text{m}^2 \text{g}^{-1}$ .

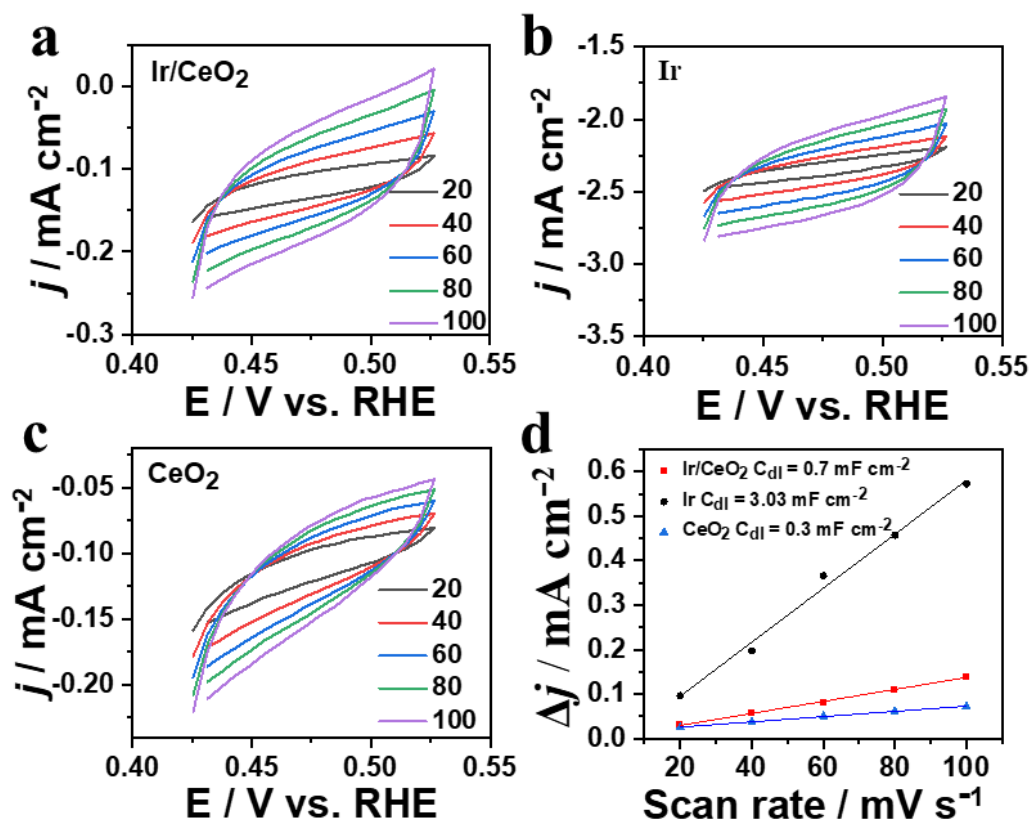

Figure S9 CV curves of (a) Ir/CeO<sub>2</sub>, (b) Ir nanorod, (c) CeO<sub>2</sub> at various scanning rate, (d) the corresponding  $C_{dl}$ . Ir/CeO<sub>2</sub> displays a small EASA, nearly one quarter that of Ir nanorod.

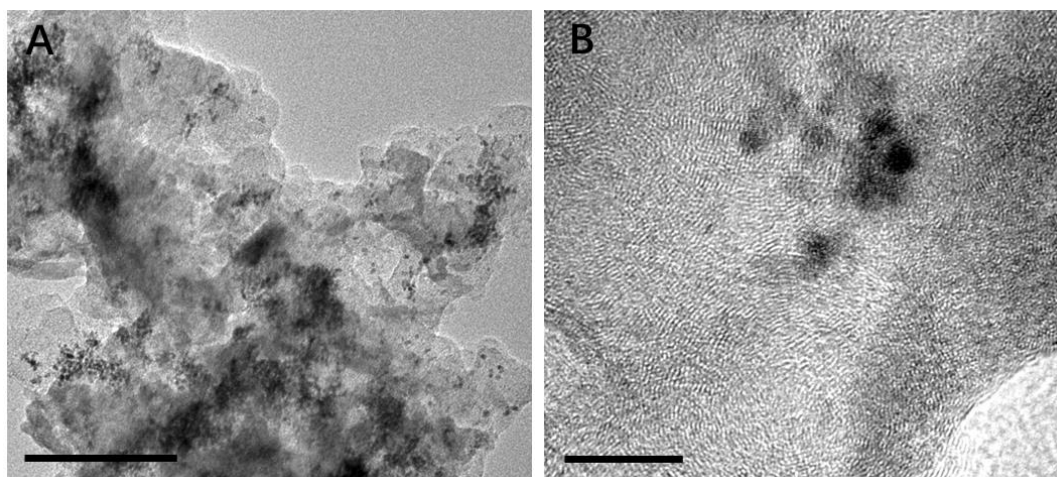

Figure S10 TEM images at (A) low and (B) high magnifications of Ir/CeO<sub>2</sub> after OER durability test. The scale bars in (A) and (B) are 100 nm and 10 nm, respectively.

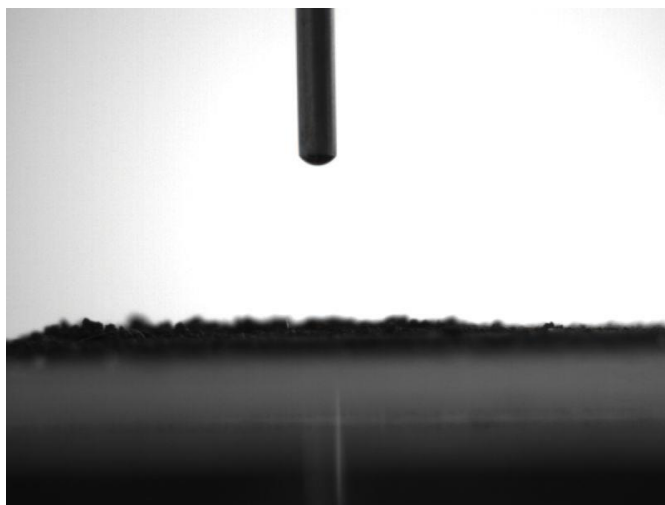

Figure S11 The contact angle of Ir/CeO<sub>2</sub>.

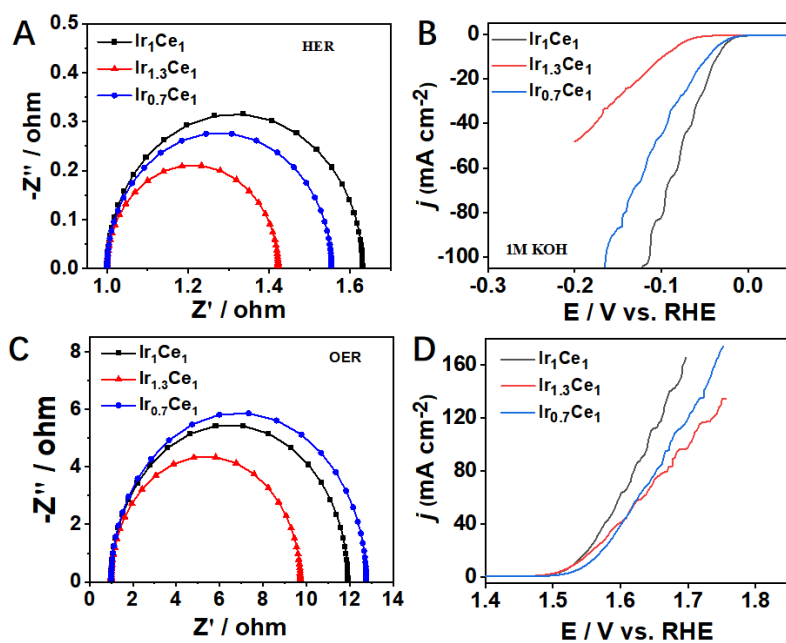

Figure S12 (A) EIS spectra and (B) HER polarization curves, (C) EIS spectra and (D) OER polarization curves of Ir/CeO<sub>2</sub> with different Ir content.

**Table S1** The catalysts with different Ir content.

| Samples  | Precursor /mg                             |                                           | Content Based on ICP/ atom. % |      |
|----------|-------------------------------------------|-------------------------------------------|-------------------------------|------|
|          | $\text{IrCl}_3 \cdot x\text{H}_2\text{O}$ | $\text{CeCl}_3 \cdot 7\text{H}_2\text{O}$ | Ir                            | Ce   |
| Ir1Ce1   | 20                                        | 30                                        | 43.4                          | 56.6 |
| Ir1.3Ce1 | 26                                        | 30                                        | 49.6                          | 50.4 |
| Ir0.7Ce1 | 14                                        | 30                                        | 31.2                          | 68.8 |

**Table S2** Comparison of HER performance in the literature.

| Catalysts                                        | $\eta_{10}$ mV | Solution  | Ref.          |
|--------------------------------------------------|----------------|-----------|---------------|
| Ir/CeO <sub>2</sub>                              | 36             | 1.0 M KOH | This work     |
| Rh nanosheets                                    | 43             | 1.0 M KOH | <sup>3</sup>  |
| Rh-Rh <sub>2</sub> P                             | 37             | 1.0 M KOH | <sup>4</sup>  |
| Rh/SWNTs                                         | 48             | 1.0 M KOH | <sup>5</sup>  |
| Rh <sub>6</sub> Cu <sub>1</sub> NPs              | 36             | 1.0 M KOH | <sup>6</sup>  |
| CoP                                              | 62.5           | 1.0 M KOH | <sup>7</sup>  |
| Co <sub>9</sub> S <sub>8</sub> @MoS <sub>2</sub> | 143            | 1.0 M KOH | <sup>8</sup>  |
| Ir ONAs                                          | 47             | 0.1 M KOH | <sup>9</sup>  |
| IrCo@NC                                          | 45             | 1.0 M KOH | <sup>10</sup> |
| Ir-OMC                                           | 80             | 0.1 M KOH | <sup>11</sup> |

**Table S3** Comparison of OER performance in the literature.

| Catalysts                                        | $\eta_{10}$ mV | Solution  | Ref.          |
|--------------------------------------------------|----------------|-----------|---------------|
| Ir/CeO <sub>2</sub>                              | 300            | 1.0 M KOH | This work     |
| Rh nanosheets                                    | 360            | 1.0 M KOH | <sup>3</sup>  |
| Rh tetrahedrons                                  | 415            | 1.0 M KOH |               |
| Rh concave tetrahedrons                          | 464            | 1.0 M KOH |               |
| CoP                                              | 330            | 1.0 M KOH | <sup>7</sup>  |
| Co <sub>9</sub> S <sub>8</sub> @MoS <sub>2</sub> | 342            | 1.0 M KOH | <sup>8</sup>  |
| IrO <sub>2</sub>                                 | 353            | 1.0 M KOH | <sup>12</sup> |

## References

1. Y. Zhang, C. Wu, H. Jiang, Y. Lin, H. Liu, Q. He, S. Chen, T. Duan and L. Song, *Adv. Mater.*, 2018, **30**, e1707522.
2. H.-P. Guo, B.-Y. Ruan, W.-B. Luo, J. Deng, J.-Z. Wang, H.-K. Liu and S.-X. Dou, *ACS Catalysis*, 2018, **8**, 9686-9696.
3. N. Zhang, Q. Shao, Y. Pi, J. Guo and X. Huang, *Chem. Mater.*, 2017, **29**, 5009-5015.
4. F. Luo, L. Guo, Y. Xie, J. Xu, W. Cai, K. Qu and Z. Yang, *J. Mater. Chem. A*, 2020, **8**, 12378-12384.
5. W. Zhang, X. Zhang, L. Chen, J. Dai, Y. Ding, L. Ji, J. Zhao, M. Yan, F. Yang, C.-R. Chang and S. Guo, *ACS Catal.*, 2018, **8**, 8092-8099.
6. W. Zhang, J. Zhao, J. Zhang, X. Chen, X. Zhang and F. Yang, *ACS Appl. Mater. Interfaces*, 2020, **12**, 10299-10306.
7. H. Li, Q. Li, P. Wen, T. B. Williams, S. Adhikari, C. Dun, C. Lu, D. Itanze, L. Jiang, D. L. Carroll, G. L. Donati, P. M. Lundin, Y. Qiu and S. M. Geyer, *Adv. Mater.*, 2018, **30**, 1705796.
8. J. Bai, T. Meng, D. Guo, S. Wang, B. Mao and M. Cao, *ACS Appl. Mater. Interfaces*, 2018, **10**, 1678-1689.
9. F. Yang, L. Fu, G. Cheng, S. Chen and W. Luo, *J. Mater. Chem. A*, 2017, **5**, 22959-22963.
10. P. Jiang, J. Chen, C. Wang, K. Yang, S. Gong, S. Liu, Z. Lin, M. Li, G. Xia, Y. Yang, J. Su and Q. Chen, *Adv Mater*, 2018, **30**.
11. Y. He, J. Xu, F. Wang, X. Zhao, G. Yin, Q. Mao, Y. Huang and T. Zhang, *Journal of Energy Chemistry*, 2017, **26**, 1140-1146.
12. W. Zhong, Z. Lin, S. Feng, D. Wang, S. Shen, Q. Zhang, L. Gu, Z. Wang and B. Fang, *Nanoscale*, 2019, **11**, 4407-4413.
